# Supplementary material
Source: PubMed Central journal article supplement (PMC2763580)

## Supplementary Figure

**Figure S1. Downregulation of SphK1 or S1P<sub>3</sub> reduces chemotaxis of MKN1 cells toward LPA and EGF.** MKN1 cells transfected as indicated with control siRNA #2, siSphK1 #2 or siSphK1 #1 (A) or siS1P<sub>3</sub> #2 (C) were allowed to migrate for 6 h through fibronectin-coated filters toward vehicle (None), 1  $\mu$ M LPA, or 10 ng/ml EGF. Results are expressed as mean number of migrating cells per field  $\pm$  S.D. \*  $p \leq 0.05$ . (B) Duplicate cultures were allowed to invade through Matrigel-coated filters. Data are expressed as fold increase compared to siControl. \*  $p \leq 0.01$ .

# Supplement Figure 1

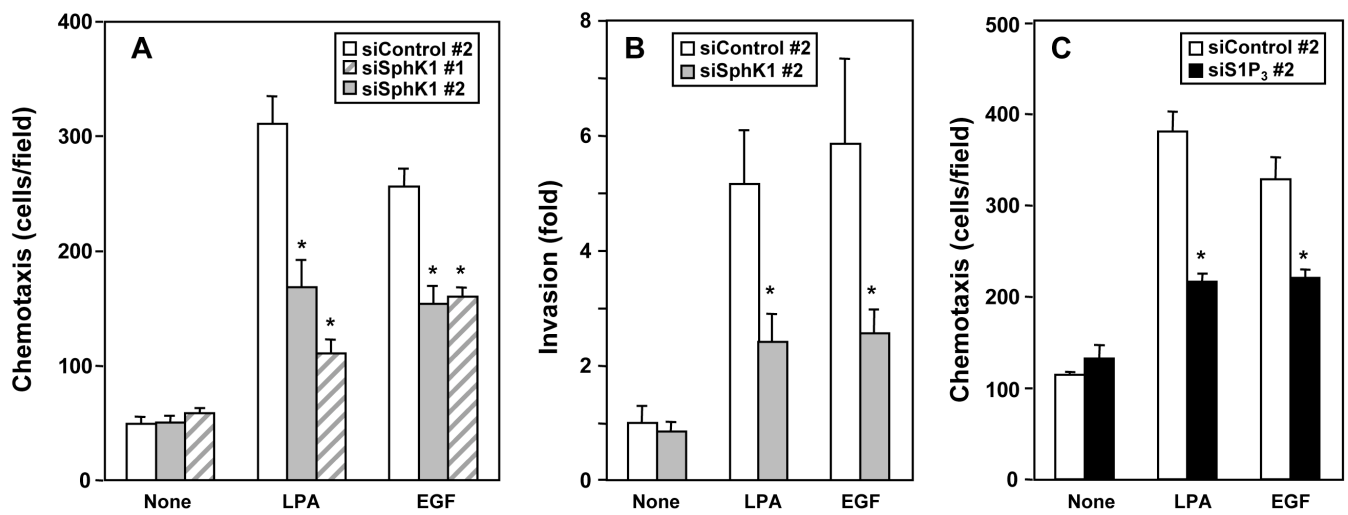

Supplement: NIHMS54645-supplement-Shida_08_review.pdf [file NIHMS54645-supplement-Shida_08_review.pdf]
